# Supplementary material
Source: publisher figshare collection journal article supplement (https://acs.figshare.com/ndownloader/files/8556067)
Supplement: Supplementary file 1 [file 8556067]

## Supporting Information

### **Tailoring active sites *via* synergy between graphitic and pyridinic N for the enhanced catalytic efficiency of carbocatalyst**

Jieyuan Li<sup>†</sup>, Shi Yin<sup>†</sup>, Fan Dong<sup>‡</sup>, Wanglai Cen<sup>§\*</sup>, Yinghao Chu<sup>†\*</sup>

<sup>†</sup>. College of Architecture and Environment, Sichuan University, P. R. China

<sup>‡</sup>. Chongqing Key Laboratory of Catalysis and New Environmental Materials, College of Environment and Resources, Chongqing Technology and Business University, P. R. China

<sup>§</sup>. Institute of New Energy and Low Carbon Technology, Sichuan University, P. R. China

\*Corresponding authors

Prof. Dr. Wanglai Cen (cenwanglai@163.com)

Prof. Dr. Yinghao Chu (chuyinghao@scu.edu.cn)

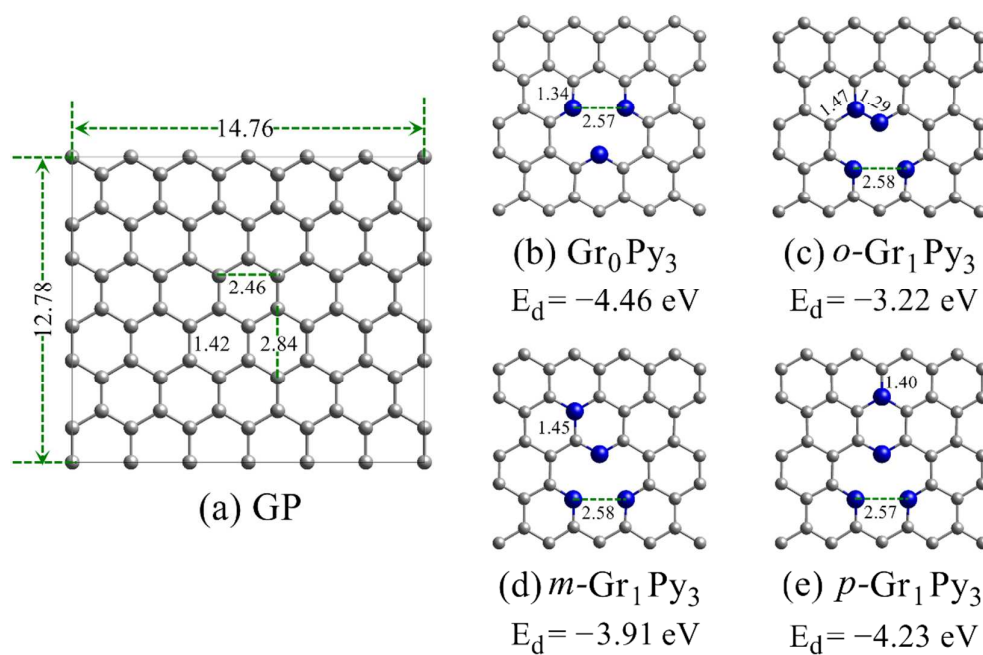

**Figure S1.** Possible local structure and doping energy ( $E_d$ ) of different N doped GP. Blue (grey) spheres depict N (C) atoms. (a) Pristine GP; (b)  $\text{Gr}_0\text{Py}_3$ ; (c)  $o\text{-Gr}_1\text{Py}_3$ ; (d)  $m\text{-Gr}_1\text{Py}_3$ ; (e)  $p\text{-Gr}_1\text{Py}_3$ . Negative means heat release.

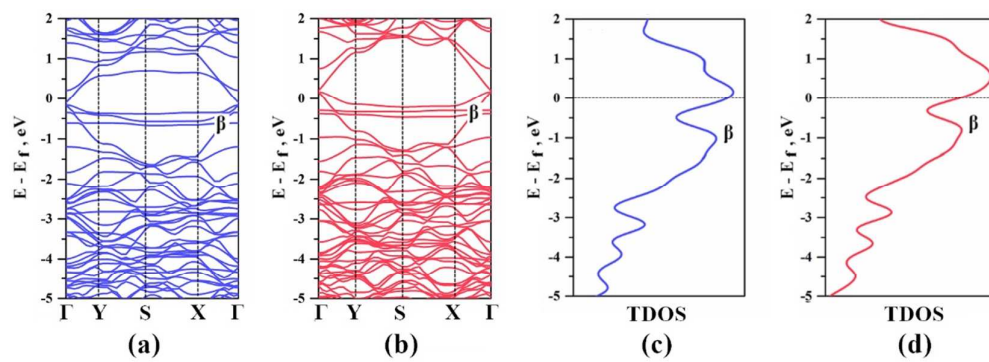

**Figure S2.** Calculated band structures (a, b) and Total density of states (c, d) of Gr<sub>0</sub>Py<sub>3</sub> and Gr<sub>1</sub>Py<sub>3</sub>, respectively. The Fermi level is set to 0 eV.

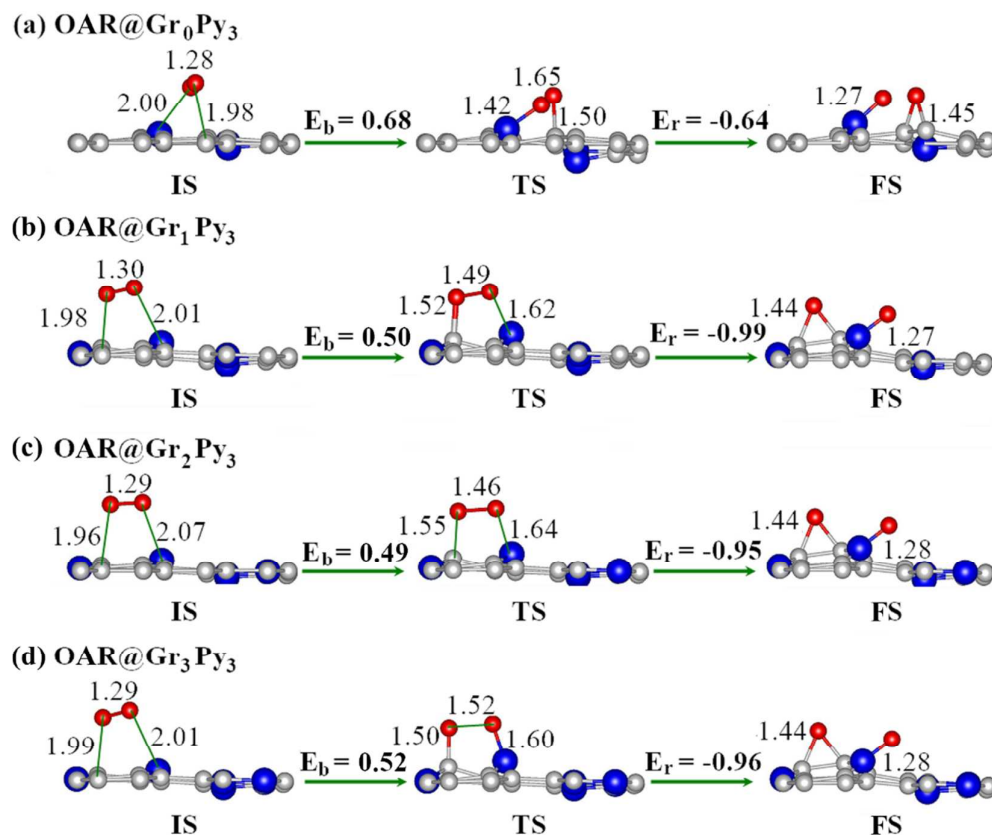

**Figure S3.** Minimum energy pathway (MEP) of  $\text{O}_2$  activation reactions (OAR) by  $\text{Gr}_0\text{Py}_3$  (a),  $\text{Gr}_1\text{Py}_3$  (b),  $\text{Gr}_2\text{Py}_3$  (c) and  $\text{Gr}_3\text{Py}_3$  (d).  $E_b$  and  $E_r$  stand for the energy barrier and reaction energy respectively. Red, blue and grey spheres depict O, N and C atoms. All lengths are given in Å.

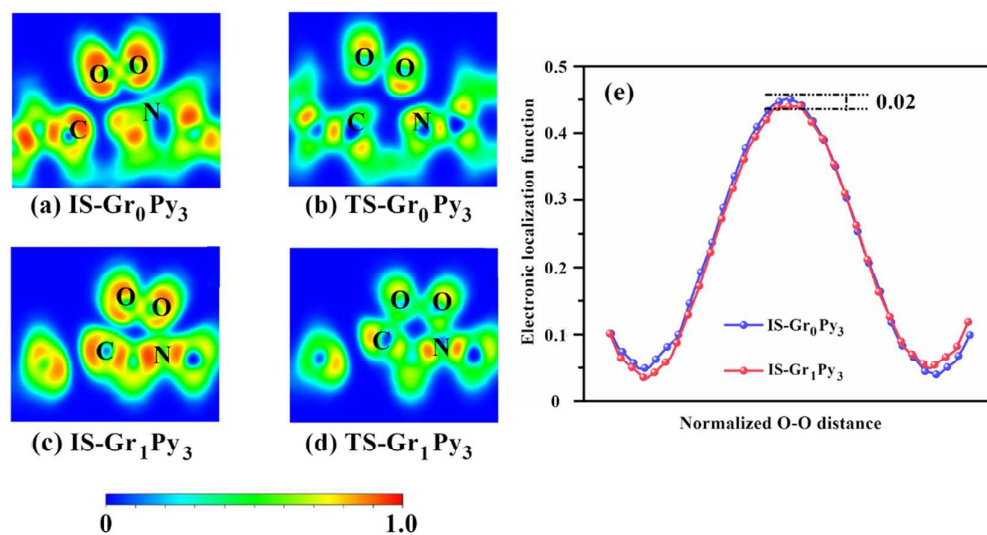

**Figure S4.** The electronic localization function (ELF) for  $O_2$  molecules in the initial state (IS) and transition (TS) of the OAR in  $Gr_0Py_3$  (a, b) and  $Gr_1Py_3$  (c, d). The line profile of ELF for IS of the OAR in  $Gr_0Py_3$  and  $Gr_1Py_3$  (e).

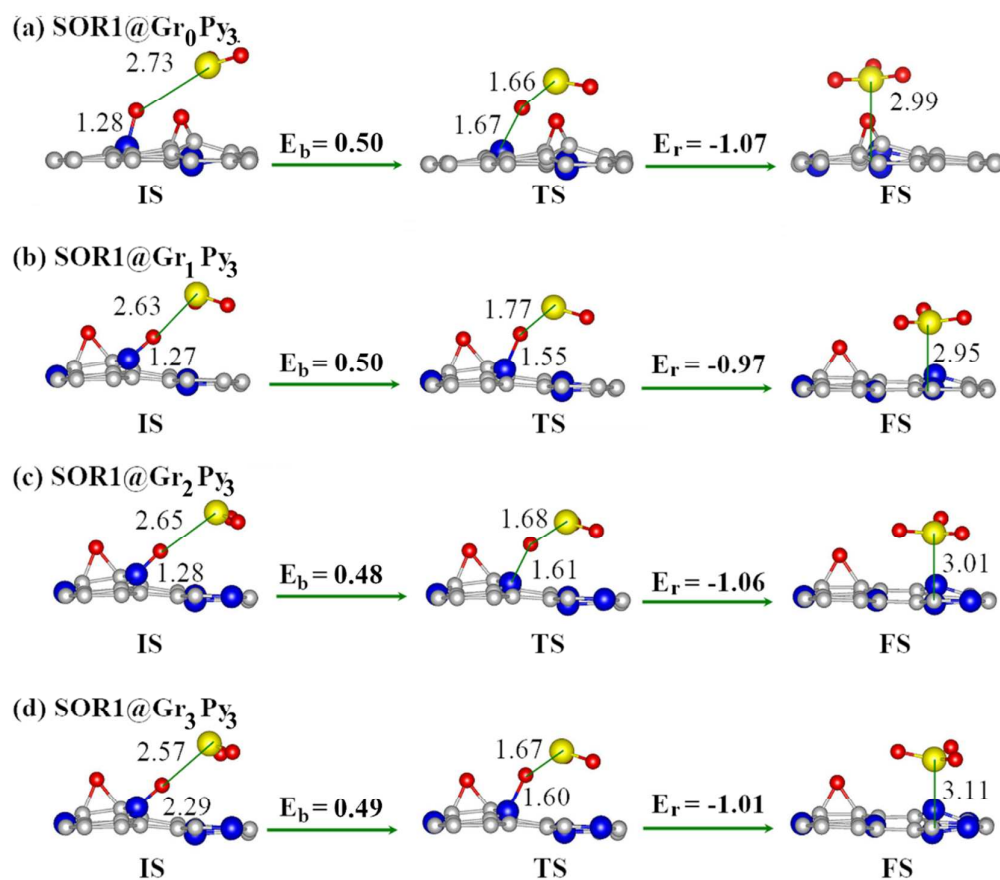

**Figure S5.** Minimum energy pathway (MEP) of  $\text{SO}_2$  oxidation reactions 1 (SOR1) by  $\text{Gr}_0\text{Py}_3$  (a),  $\text{Gr}_1\text{Py}_3$  (b),  $\text{Gr}_2\text{Py}_3$  (c) and  $\text{Gr}_3\text{Py}_3$  (d).  $E_b$  and  $E_r$  stand for the energy barrier and reaction energy respectively. Red, blue and grey spheres depict O, N and C atoms. All lengths are given in Å.

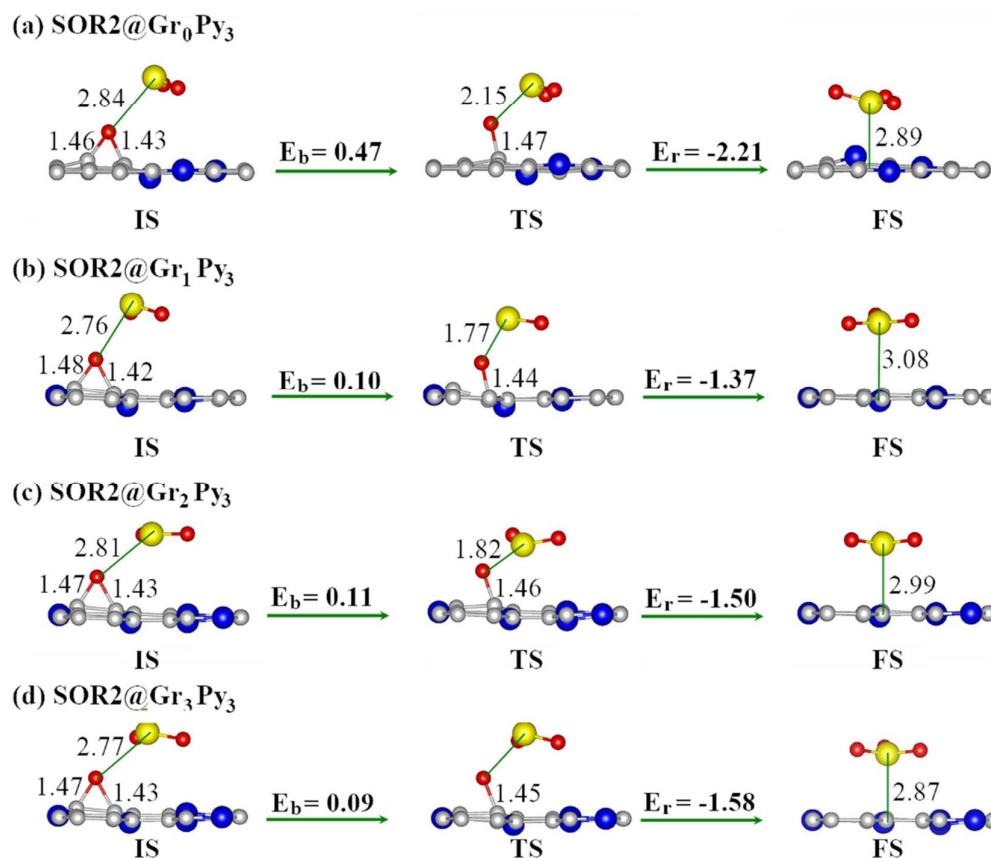

**Figure S6.** Minimum energy pathway (MEP) of  $\text{SO}_2$  oxidation reactions 2 (SOR2) by  $\text{Gr}_0\text{Py}_3$  (a),  $\text{Gr}_1\text{Py}_3$  (b),  $\text{Gr}_2\text{Py}_3$  (c) and  $\text{Gr}_3\text{Py}_3$  (d).  $E_b$  and  $E_r$  stand for the energy barrier and reaction energy respectively. Red, blue and grey spheres depict O, N and C atoms. All lengths are given in Å.
